# Supplementary material for: Comparative analysis of programmed cell death pathways in filamentous fungi
Source: Springer Nature journal article supplement (doi:10.1186/1471-2164-6-177), 2005-12-01
Supplement: Additional file 2 [file 1471-2164-6-177-s2.doc]

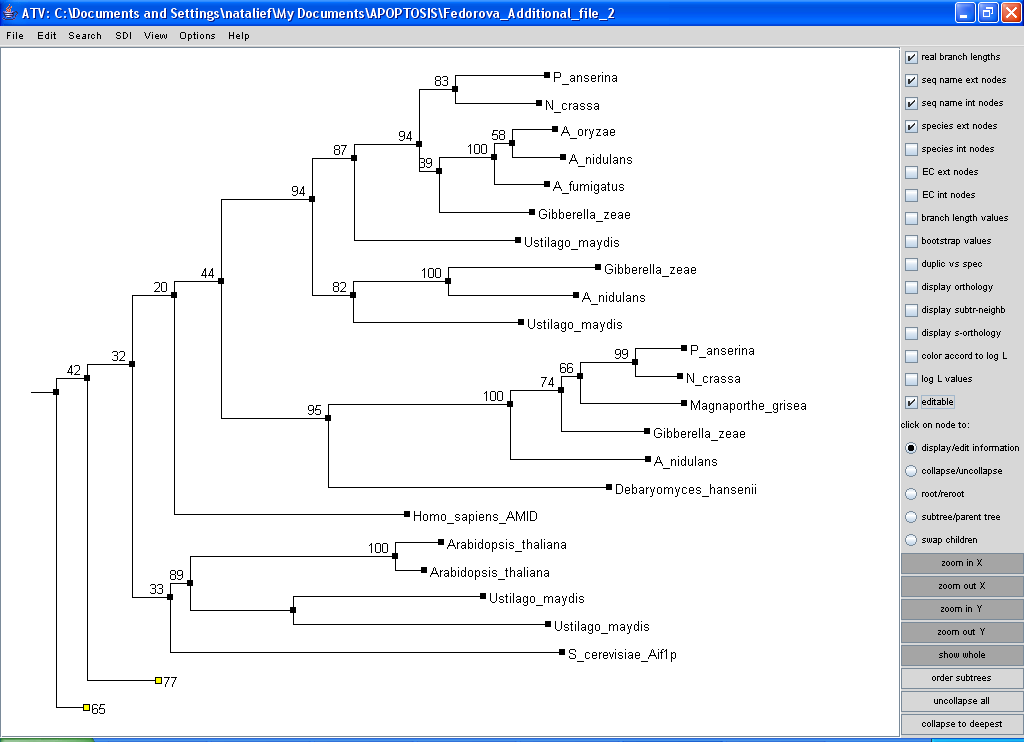


Bacterial and archeal oxidoreductases

Related fungal oxidoreductases

S. cerevisiae Aif1p

Homo sapiens AMID
